# Supplementary material for: Manipulating network connectance by altering plant attractiveness
Source: PeerJ journal article supplement (doi:10.7717/peerj.16319), 2023-11-09
Supplement: Russo_FigureS1.pdf [file Russo_FigureS1.pdf]

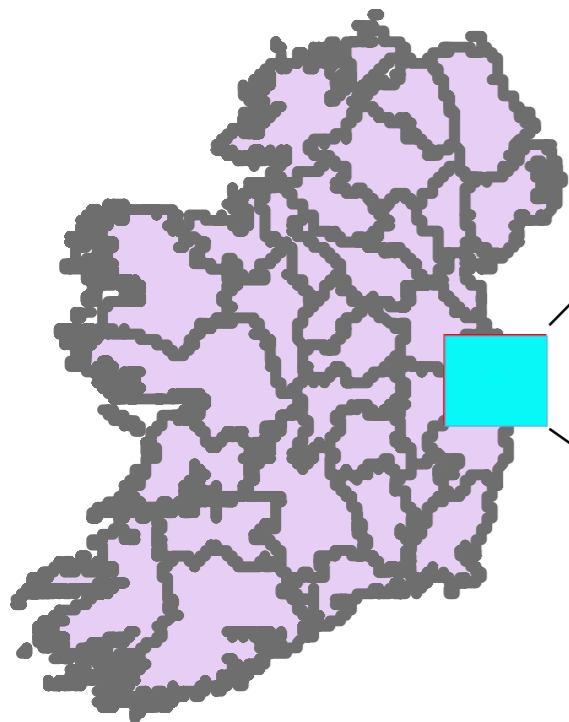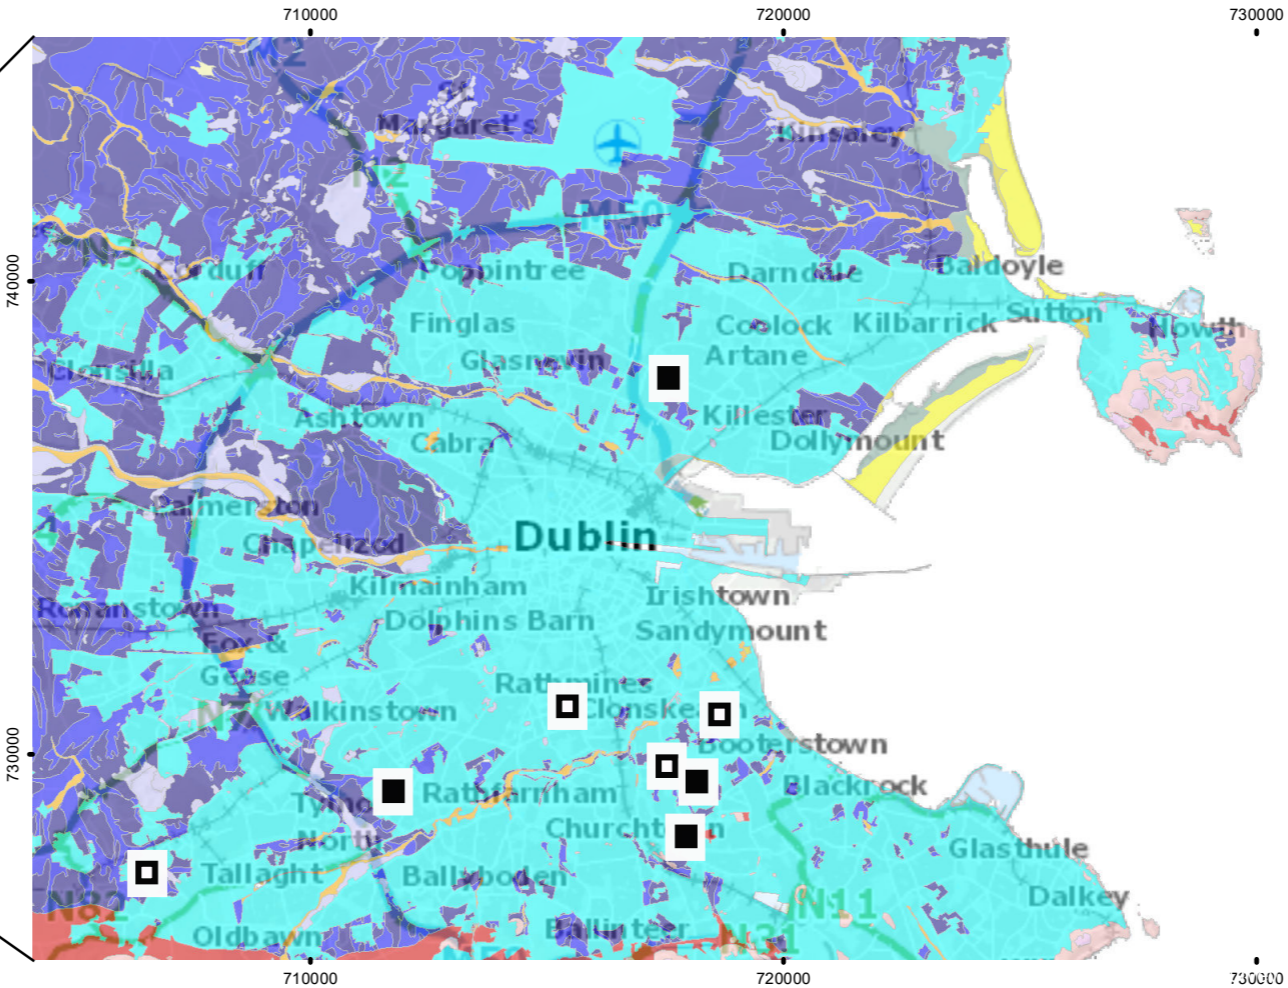

### Teagasc Soils

#### Legend

- Made ground
- Deep well drained mineral
- Shallow well drained mineral
- Shallow, rocky mineral complex
- Deep well drained mineral
- Poorly drained mineral
- Shallow well drained mineral
- Aeolian undifferentiated
- Marine sand and gravel

- Planted in 2018
- Planted in 2017

Scale: 1:200,000

**Geological Survey Ireland**

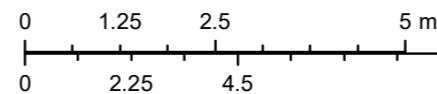

This map and its data may not be used or reproduced for commercial purposes without the prior written permission of Copyright holders.  
 This map is a user generated static output from an Internet mapping site and is for general reference only.  
 Data layers that appear on this map may or may not be accurate, current, or otherwise reliable.

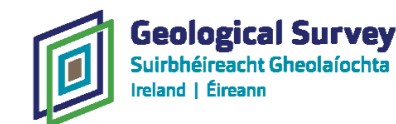

Ordnance Survey Ireland Licence No. EN 0047219  
 © Ordnance Survey Ireland/Government of Ireland  
 © Geological Survey Ireland/Government of Ireland
