# Supplementary material for: Manipulating network connectance by altering plant attractiveness
Source: PeerJ journal article supplement (doi:10.7717/peerj.16319), 2023-11-09

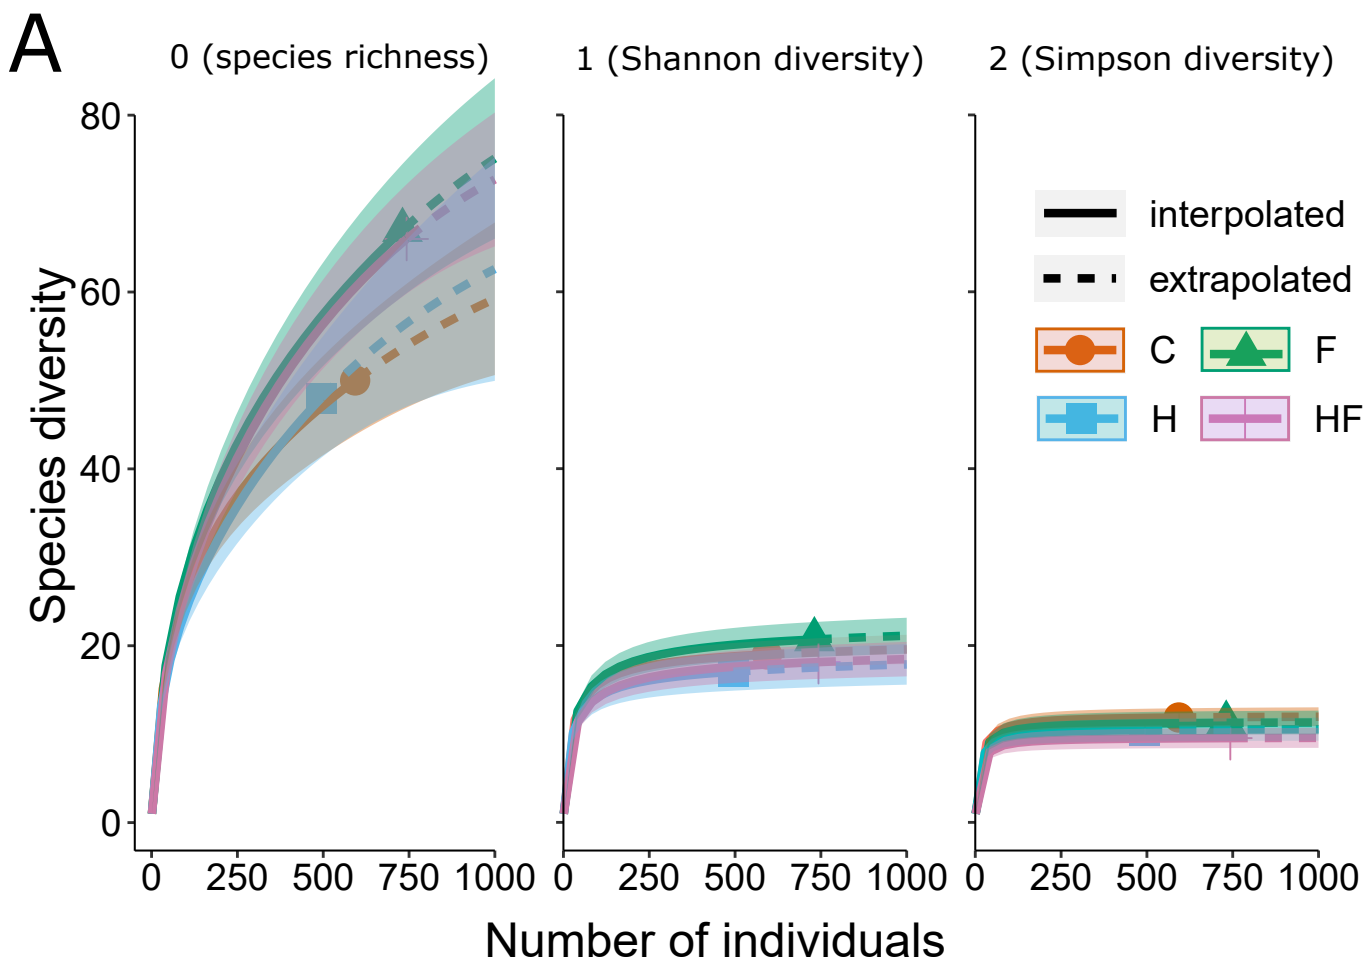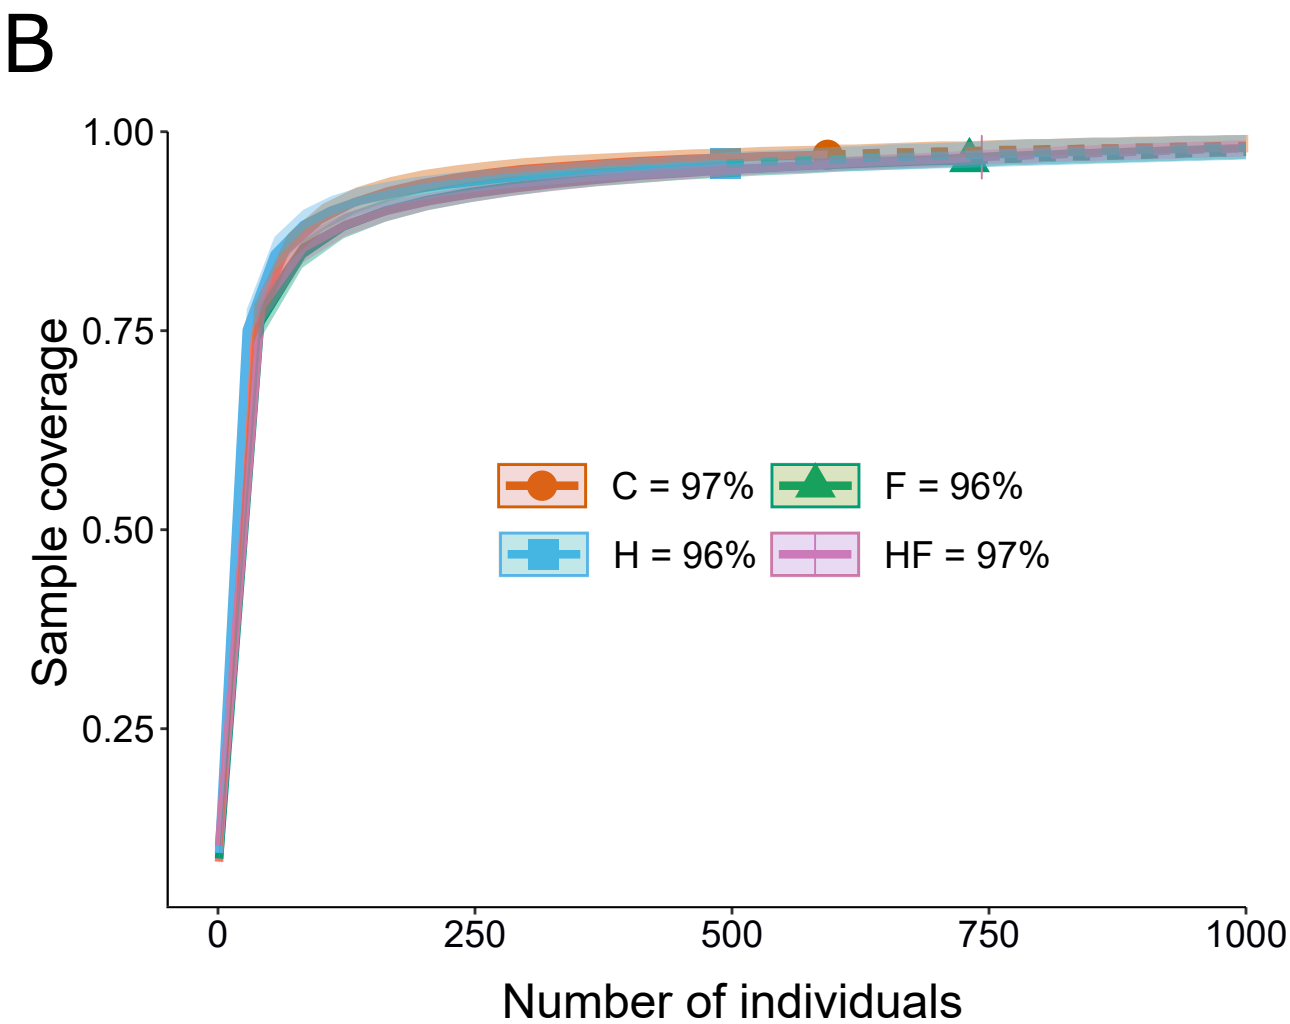

Supplement: Russo_FigureS4.pdf [file Russo_FigureS4.pdf]
