# Supplementary material for: Manipulating network connectance by altering plant attractiveness
Source: PeerJ journal article supplement (doi:10.7717/peerj.16319), 2023-11-09
Supplement: Russo_FigureS8.pdf [file Russo_FigureS8.pdf]

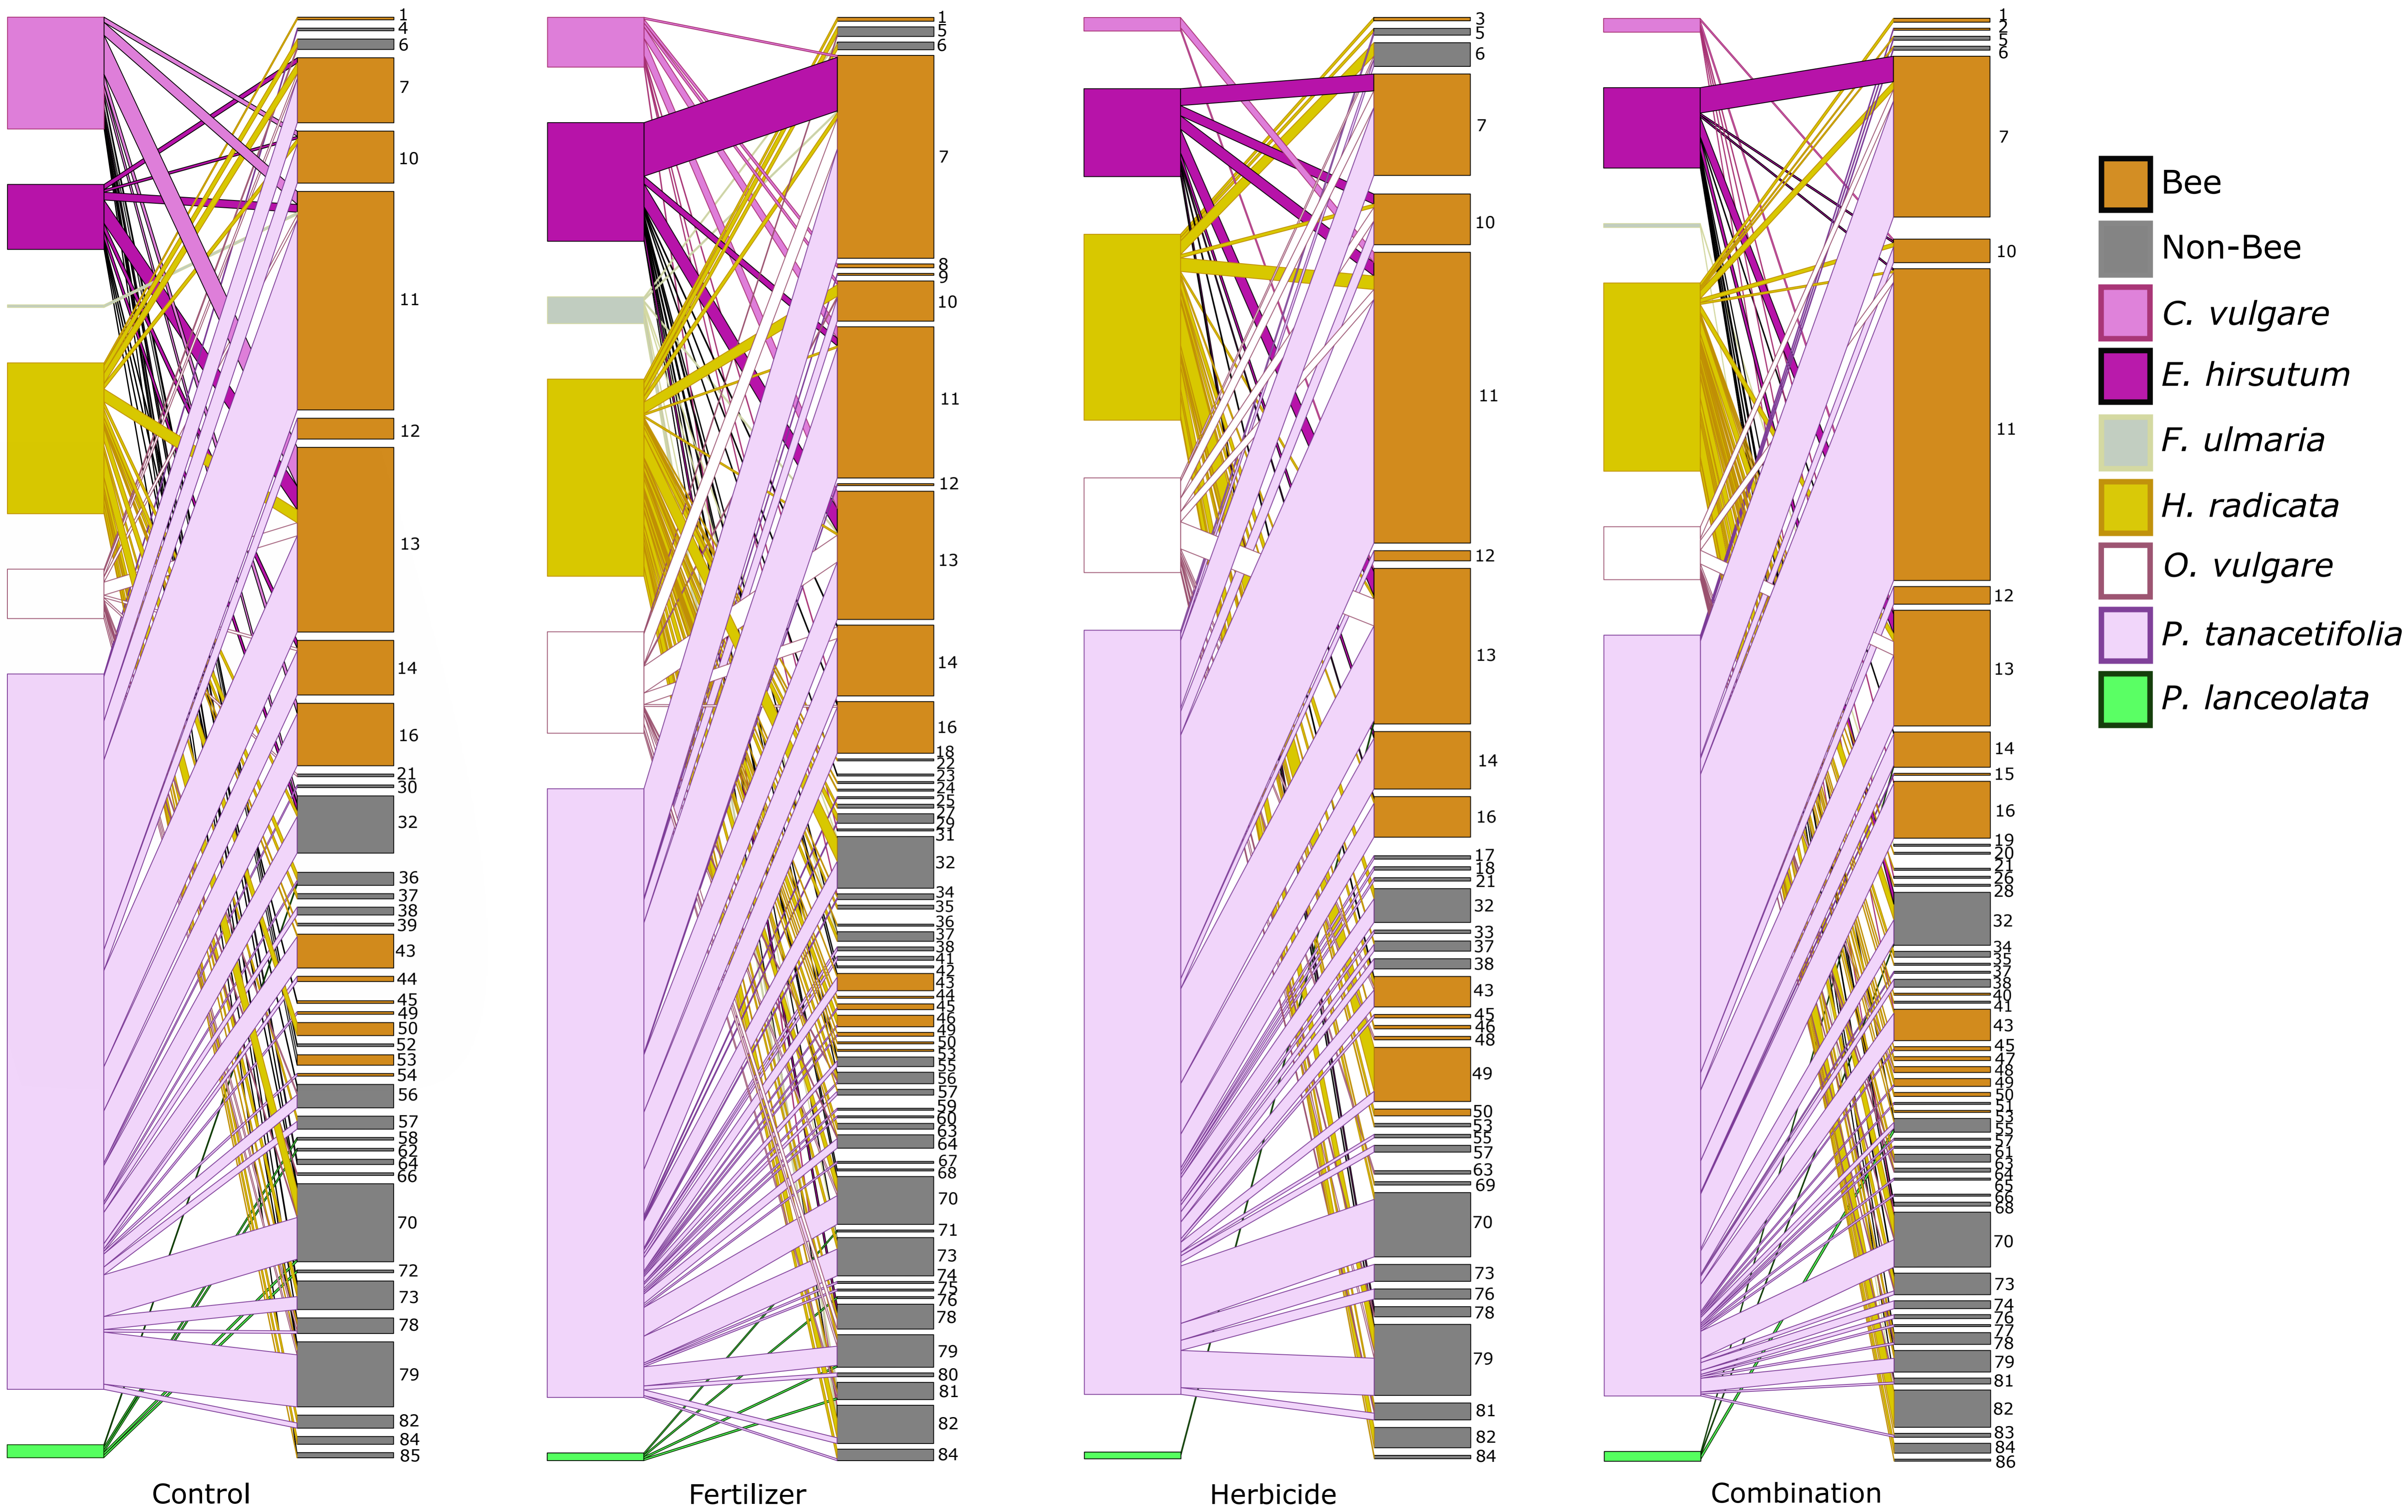

Control

Fertilizer

Herbicide

Combination
