# Supplementary material for: Manipulating network connectance by altering plant attractiveness
Source: PeerJ. 2023 Nov 9;11:e16319. doi: 10.7717/peerj.16319 (PMC10640842; doi:10.7717/peerj.16319)
Supplement: Supplemental Information 2 — The treatment applied (H = herbicide, C = control, F = fertilizer, HF = combination), the plot name, block ID, abundance of insect visitors collected, weighted and unweighted degrees, NODF, modularity, experiment-wide connectance, plant species richness (number of species that bloomed in the plot out of 7), number of insect species, the size (mm) of the inflorescences, the number of flowers, the total display size (size * number of flowers), then the z-scores (relative to 500 null models) for connectance, NODF, unweighted and weighted degrees, and modularity. [file peerj-11-16319-s002.xlsx]

## Sheet: Sheet1
Treatment	Plot	Block	Abundance	Weighted degree	Unweighted degree	NODF	NODFc	Modularity	Experiment-wide connectance	Plant Richness (w/visitor)	Insect Visitor Richness	Size (mm)	FlowerNo	Display	Unweighted Links	Weighted Links	Experiment Visitor Richness	Connectance z-score	NODF z-score	Unweighted degree z-score	Weighted degree z-score	Modularity z-score	NODFc z-score
H	AE1	AE	26	1.73	1	21.97	2.29	0.4	0.03	4	11	15	751	10191.2	15	26	111	-1.98828	-1.98828	-1.91736	-2.34421	1.68413	-1.31702
F	AE3	AE	43	2.05	1.14	10.26	1.95	0.46	0.07	3	18	21	1292	19618.7	24	43	111	-2.60679	-2.60679	-2.48522	-3.28259	3.81986	0.677248
HF	AE4	AE	32	1.78	1.22	18.26	1.66	0.4	0.04	5	13	18	1310	14465.5	22	32	111	-0.953132	-0.953132	-1.69329	-1.22184	0.814589	-1.91062
H	GNI1	GNI	29	1.71	0.94	9.87	2.68	0.4	0.03	5	12	17	2022	22439.7	16	29	111	-1.63041	-1.63041	-1.13275	-1.89416	2.40132	-0.766928
C	GNI2	GNI	25	1.56	1	11.81	1.77	0.43	0.04	4	12	16	1332	12561.6	16	25	111	-2.15503	-2.15503	-2.60763	-2.24332	1.3198	-2.73367
F	GNI3	GNI	50	1.92	1.19	15.85	2.15	0.47	0.05	6	20	26	1609	18183.2	31	50	111	-3.04823	-3.04823	-2.07446	-1.37044	2.92341	1.38924
HF	GNI4	GNI	21	1.24	1	16.67	2.01	0.52	0.04	4	13	17	821	8627.72	17	21	111	-1.20538	-1.20538	-0.8171	-1.14301	1.17058	-0.0935744
F	MI1	MI	99	3.3	1.6	24.48	1.7	0.38	0.07	6	24	30	2366	25557.2	48	99	111	-4.60795	-4.60795	-3.20506	-4.12256	5.03237	-0.0272178
HF	MI2	MI	36	2.12	1.35	9.52	2.02	0.33	0.05	4	13	17	1167	16179.8	23	36	111	0.106903	0.106903	0.225516	0.514232	0.485148	0.244813
H	MI3	MI	14	1.08	0.92	14.29	1.31	0.55	0.03	4	9	13	838	10214.2	12	14	111	-0.867714	-0.867714	-0.82	-0.76967	1.1031	-0.675029
C	MI4	MI	74	3.36	1.55	46.19	2.07	0.29	0.05	6	16	22	2704	35895.9	34	74	111	-1.71551	-1.71551	-1.19186	-2.5045	1.74586	0.113317
F	RTE1	RTE	33	3	1	48.39	2.69	0.22	0.03	3	8	11	4069	42302	11	33	111	-1.83615	-1.83615	-0.636356	-0.452601	1.9222	0.604593
HF	RTE2	RTE	21	1.62	0.77	13.16	1.44	0.44	0.02	5	8	13	3137	30029.1	10	21	111	-3.04085	-3.04085	-2.84507	-3.18144	3.29984	-2.60522
H	RTE3	RTE	11	1.1	1	33.33	2.28	0.32	0.02	4	6	10	2016	19027.4	10	11	111	1.48364	1.48364	0.984467	1.36096	-1.01732	0.634687
C	RTE4	RTE	31	2.58	1.17	50.54	2.92	0.22	0.03	5	7	12	3258	33355.5	14	31	111	-0.901501	-0.901501	0.943146	0.685292	0.199221	1.90473
F	RV1	RV	27	1.8	0.93	20	2.01	0.28	0.03	5	10	15	1058	12008.4	14	27	111	-1.25229	-1.25229	-1.61917	-0.503201	0.456752	-1.96292
C	RV2	RV	105	4.77	1.32	32.22	2	0.25	0.04	6	16	22	4015	47761.1	29	105	111	-1.7196	-1.7196	-3.36302	-4.33545	4.39109	-2.43301
HF	RV3	RV	88	4.63	1.05	20.27	1.95	0.23	0.05	4	15	19	4064	45289.9	20	88	111	-2.68139	-2.68139	-4.26548	-4.14118	6.39458	-2.22328
H	RV4	RV	70	3.68	1.16	47.75	3	0.14	0.05	4	15	19	3813	44007.8	22	70	111	0.590113	0.590113	0.643595	-1.07015	0.971547	-0.32859
F	TCD1	TCD	90	3.75	1.21	33.04	2.71	0.33	0.04	6	18	24	4926	52534.7	29	90	111	-3.53498	-3.53498	-1.8019	-2.31965	5.61865	2.35467
C	TCD2	TCD	16	1.33	1	33.33	2.58	0.44	0.02	5	7	12	1443	10274.9	12	16	111	-0.845925	-0.845925	0.313074	-0.363001	0.729556	1.3533
HF	TCD3	TCD	11	1	0.82	18.52	1.24	0.55	0.02	4	7	11	874	6081.23	9	11	111	-0.983379	-0.983379	-0.906739	-0.23556	1.39439	-0.811357
H	TCD4	TCD	3	0.6	0.6	0	NA	0.44	0.01	3	2	5	662	5930.79	3	3	111	NA	NA	NA	NA	NA	NA
C	UCDM1	UCDM	110	5.24	1	22.44	2.31	0.18	0.06	3	18	21	3413	43953.2	21	110	111	-4.62528	-4.62528	-5.76781	-7.33704	5.75285	0.833946
H	UCDM2	UCDM	107	4.12	1.27	38.19	2.01	0.23	0.07	4	22	26	3298	44955.1	33	107	111	-0.914357	-0.914357	-2.32487	-4.27102	4.493	-2.55539
F	UCDM3	UCDM	178	5.24	1.41	40.02	1.68	0.26	0.11	4	30	34	3774	53046.3	48	178	111	-2.94682	-2.94682	-3.8162	-6.45774	7.37405	-1.09868
HF	UCDM4	UCDM	165	5.32	1.23	32.07	1.99	0.31	0.09	4	27	31	4346	66457.7	38	165	111	-4.92634	-4.92634	-6.54075	-8.29613	10.3196	-0.486842
C	UCDR1	UCDR	65	2.5	1.12	20.24	2.27	0.34	0.04	6	20	26	4054	52154.3	29	65	111	-3.75487	-3.75487	-4.12714	-3.78717	1.96286	-1.03305
H	UCDR2	UCDR	81	3.52	1.35	53.95	2.39	0.26	0.07	4	19	23	5450	63569.4	31	81	111	-1.24234	-1.24234	0.0149141	-0.728991	2.65948	2.14114
F	UCDR3	UCDR	60	2.22	1.19	28.59	2.19	0.37	0.05	6	21	27	3537	39890.6	32	60	111	-3.44288	-3.44288	-3.03872	-2.87503	1.67412	-0.536239
HF	UCDR4	UCDR	192	6.19	1.19	30.57	2.66	0.25	0.06	6	25	31	12178	143143	37	192	111	-2.69589	-2.69589	-3.87494	-8.12189	10.7565	-1.49275
