# Supplementary material for: Manipulating network connectance by altering plant attractiveness
Source: PeerJ. 2023 Nov 9;11:e16319. doi: 10.7717/peerj.16319 (PMC10640842; doi:10.7717/peerj.16319)
Supplement: Supplemental Information 3 — The networks of interactions and their frequencies for the plants and pollinators in each research plot. [file peerj-11-16319-s003.xlsx]

## Sheet: README
Description of data file	Each sheet contains a season-aggregated network of interactions between plant and flower-visitor species, including frequency (abundance) of visitation.
Sheet names	The name of each sheet has the site name, plot number, and treatment.
Variable names	Year: Year of data collection for that plot
	Plot: Site name and plot number
	Trt: Experimental treatment. H = herbicide, F = fertilizer, HF = combination, C = control
Other details	Plant species are rows, insect species are columns. Morphospecies listed as morph1, 2, etc.
Associated publication	Russo and Stout. "Manipulating network connectance by altering plant attractiveness"

## Sheet: AE1.H
Year	Plot	Trt
2018	AE.1	H
	Anthomyiid_morph1	Anthomyiid_morph2	Apis_mellifera	Bombus_lapidarius	Bombus_pascuorum	Episyrphus_balteatus	Hylaeus_communis	Lasioglossum_leucopus	Myathropa_florea	Sphaerophoria_scripta	Syritta_pipiens
Epilobium.hirsutum	0	0	0	1	2	0	0	0	0	0	0
Hypochaeris.radicata	1	2	0	1	0	1	1	6	0	0	1
Oregano.vulgare	0	1	1	3	3	0	0	0	1	0	0
Phacelia.tanacetifolia	0	0	0	0	0	0	0	0	0	1	0

## Sheet: AE3.F
Year	Plot	Trt
2018	AE.3	F
	Anthomyiid_morph1	Anthomyiid_morph2	Apis_mellifera	Bombus_lapidarius	Bombus_lucorum.agg.	Bombus_pascuorum	Bombus_pratorum	Diptera_morph1	Diptera_morph2	Diptera_morph3	Dolichopodid_morph1	Empid_morph2	Episyrphus_balteatus	Neoascia_podagrica	Platycheirus_albimanus	Platycheirus_scutatus	Siphona_geniculata	Syrphus_ribesii
Epilobium.hirsutum	0	0	2	0	0	2	0	0	0	0	0	0	0	0	0	1	1	0
Hypochaeris.radicata	3	1	0	1	0	0	0	1	1	0	2	0	4	0	1	1	0	1
Phacelia.tanacetifolia	0	0	1	0	7	1	1	0	0	1	0	1	3	4	1	1	0	0

## Sheet: AE4.HF
Year	Plot	Trt
2018	AE.4	HF
	Apis_mellifera	Bombus_lapidarius	Bombus_lucorum.agg.	Bombus_pascuorum	Chrysogaster_solstitialis	Episyrphus_balteatus	Melanostoma_scalare	Myathropa_florea	Neoascia_podagrica	Platycheirus_albimanus	Platycheirus_scutatus	Seioptera_vibrans	Syrphus_ribesii
Epilobium.hirsutum	1	0	0	3	0	1	0	0	0	0	0	0	0
Filipendula.ulmaria	0	0	0	0	1	0	0	0	0	0	0	0	1
Hypochaeris.radicata	0	1	0	1	0	3	0	1	1	3	1	0	1
Oregano.vulgare	0	0	1	0	0	0	0	0	1	0	0	0	0
Phacelia.tanacetifolia	0	1	3	3	0	0	1	0	0	1	1	1	0

## Sheet: GNI1.H
Year	Plot	Trt
2017	GNI.1	H
	Bombus_lucorum.agg.	Braconid_morph1	Dasysyrphus_albostriatus	Episyrphus_balteatus	Lasioglossum_leucopus	Melanostoma_mellinum	Meliscaeva_auricollis	Platycheirus_albimanus	Platycheirus_scutatus	Siphona_geniculata	Sphaerophoria_scripta	Syritta_pipiens
Cirsium.vulgare	2	0	0	0	0	0	0	0	0	0	0	0
Hypochaeris.radicata	0	0	0	1	1	1	0	2	0	0	2	0
Oregano.vulgare	0	0	0	0	0	0	0	0	0	1	1	0
Phacelia.tanacetifolia	1	0	1	0	0	0	1	9	2	0	2	1
Plantago.lanceolata	0	1	0	0	0	0	0	0	0	0	0	0

## Sheet: GNI2.C
Year	Plot	Trt
2017	GNI.2	C
	Anthomyiid_morph2	Bombus_lucorum.agg.	Bombus_pascuorum	Bombus_pratorum	Bombus_terrestris	Eupeodes_corollae	Melanostoma_scalare	Platycheirus_albimanus	Platycheirus_scutatus	Siphona_geniculata	Sphaerophoria_scripta	Syrphus_ribesii
Hypochaeris.radicata	2	0	1	0	0	0	0	2	1	0	0	1
Oregano.vulgare	1	0	2	0	0	0	1	0	0	1	0	0
Phacelia.tanacetifolia	0	3	0	1	1	0	0	4	0	0	1	2
Plantago.lanceolata	0	0	0	0	0	1	0	0	0	0	0	0

## Sheet: GNI3.F
Year	Plot	Trt
2017	GNI.3	F
	Anthomyiid_morph1	Anthomyiid_morph2	Bombus_lucorum.agg.	Bombus_pascuorum	Bombus_pratorum	Bombus_terrestris	Eupeodes_luniger	Hylaeus_communis	Lasioglossum_albipes	Lasioglossum_calceatum	Lasioglossum_leucopus	Melanostoma_mellinum	Melanostoma_scalare	Muscid_morph2	Platycheirus_albimanus	Platycheirus_scutatus	Scaeva_pyrastri	Siphona_geniculata	Syrphus_ribesii
Cirsium.vulgare	0	0	0	3	0	0	0	0	0	0	0	0	0	0	0	0	0	0	0
Epilobium.hirsutum	0	0	1	2	0	0	0	0	0	0	0	1	1	0	0	0	0	0	0
Hypochaeris.radicata	0	2	0	1	0	0	0	1	0	1	1	1	1	0	2	0	0	0	0
Oregano.vulgare	1	0	0	5	0	0	0	0	0	0	0	0	1	0	0	0	0	4	0
Phacelia.tanacetifolia	0	0	3	2	1	1	1	1	1	0	0	0	0	1	3	2	0	0	2
Plantago.lanceolata	0	0	0	0	0	0	0	0	0	0	0	0	0	0	0	0	1	0	0

## Sheet: GNI4.HF
Year	Plot	Trt
2017	GNI.4	HF
	Anthomyiid_morph1	Anthomyiid_morph2	Bombus_lucorum.agg.	Bombus_pascuorum	Bombus_terrestris	Chrysotoxum_bicinctum	Cryptinae_unknown	Lasioglossum_cupromicans	Melanostoma_scalare	Myathropa_florea	Platycheirus_albimanus	Siphona_geniculata	Syrphus_ribesii
Epilobium.hirsutum	0	0	0	1	0	0	0	0	1	0	0	0	0
Hypochaeris.radicata	1	0	0	0	0	1	0	2	0	0	1	1	1
Oregano.vulgare	0	0	1	3	0	0	0	0	0	1	0	0	0
Phacelia.tanacetifolia	1	1	1	0	1	0	1	0	0	0	2	0	0

## Sheet: MI1.F
Year	Plot	Trt
2018	MI.1	F
	Apis_mellifera	Bombus_lapidarius	Bombus_lucorum.agg.	Bombus_pascuorum	Bombus_pratorum	Bombus_terrestris	Empid_morph2	Episyrphus_balteatus	Eupeodes_corollae	Eupeodes_latifasciatus	Herinigia_heringi	Lasioglossum_calceatum	Melanostoma_mellinum	Melanostoma_scalare	Meliscaeva_auricollis	Myathropa_florea	Neoascia_podagrica	Platycheirus_albimanus	Platycheirus_scutatus	Siphona_geniculata	Sphaerophoria_scripta	Syritta_pipiens	Syrphus_ribesii	Syrphus_vitripennis
Epilobium.hirsutum	4	0	0	2	1	1	0	0	0	0	1	0	0	0	0	0	0	0	0	3	0	0	0	0
Filipendula.ulmaria	0	0	0	1	0	0	0	0	0	1	0	0	0	0	0	0	0	0	1	0	0	3	0	0
Hypochaeris.radicata	0	4	0	0	0	0	4	2	1	1	0	1	0	0	0	2	1	0	0	2	1	2	1	0
Oregano.vulgare	5	1	0	2	6	1	0	0	0	0	0	0	0	0	0	0	1	2	0	1	3	2	0	0
Phacelia.tanacetifolia	2	4	3	2	2	4	0	6	0	0	0	0	1	1	1	0	1	1	1	0	4	0	0	1
Plantago.lanceolata	0	0	0	0	0	0	0	0	0	0	0	0	0	0	0	0	0	0	0	0	0	1	0	0

## Sheet: MI2.HF
Year	Plot	Trt
2018	MI.2	HF
	Anthomyiid_morph2	Apis_mellifera	Bombus_lapidarius	Bombus_lucorum.agg.	Bombus_pascuorum	Bombus_sylestris	Dasysyrphus_albostriatus	Episyrphus_balteatus	Melanostoma_scalare	Platycheirus_albimanus	Platycheirus_scutatus	Siphona_geniculata	Syrphus_ribesii
Epilobium.hirsutum	0	1	0	0	0	0	0	3	0	1	2	1	0
Hypochaeris.radicata	1	0	0	0	0	0	1	3	0	2	1	2	2
Oregano.vulgare	0	0	0	0	0	0	0	0	0	1	0	1	0
Phacelia.tanacetifolia	0	0	1	1	2	1	0	1	2	4	1	1	0

[truncated: 22 more sheets: MI3.H, MI4.C, RTE1.F, RTE2.HF, RTE3.H, RTE4.C, RV1.F, RV2.C, RV3.HF, RV4.H, TCD1.F, TCD2.C, TCD3.HF, TCD4.H, UCDM1.C, UCDM2.H, UCDM3.F, UCDM4.HF, UCDR1.C, UCDR2.H …]
